# Supplementary material for: Band-Gap Engineering of NaNbO3for Photocatalytic H2Evolution with Visible Light
Source: Hindawi journal article supplement (doi:10.1155/2014/380421), 2014-01-01
Supplement: f1 [file 380421.f1.pdf]

## Supporting Information

# Band-gap engineering of $\text{NaNbO}_3$ for photocatalytic $\text{H}_2$ evolution with visible light

*Peng Li,<sup>1</sup> Hideki Abe,<sup>\*1,2,3</sup> Jinhua Ye<sup>1,2,4</sup>*

1. Catalytic Materials Group, Environmental Remediation Materials Unit, National Institute for Materials Science (NIMS), 1-1 Namiki, Tsukuba, Ibaraki 305-0044, Japan

2. TU-NIMS Joint Research Center, School of Materials Science and Engineering, Tianjin University, 92 Weijin Road, Nankai District, Tianjin, P. R. China

3. PRESTO, Japan Science and Technology Agency (JST), 4-1-8 Honcho Kawaguchi, Saitama 332-0012, Japan

4. International Center for Materials Nanoarchitectonics (WPI-MANA), National Institute for Materials Science (NIMS), 1-1 Namiki, Tsukuba, Ibaraki 305-0044, Japan

KEYWORDS: photocatalysis, water reduction,  $\text{NaNbO}_3$ , doping

E-mail: ABE.Hideki@nims.go.jp

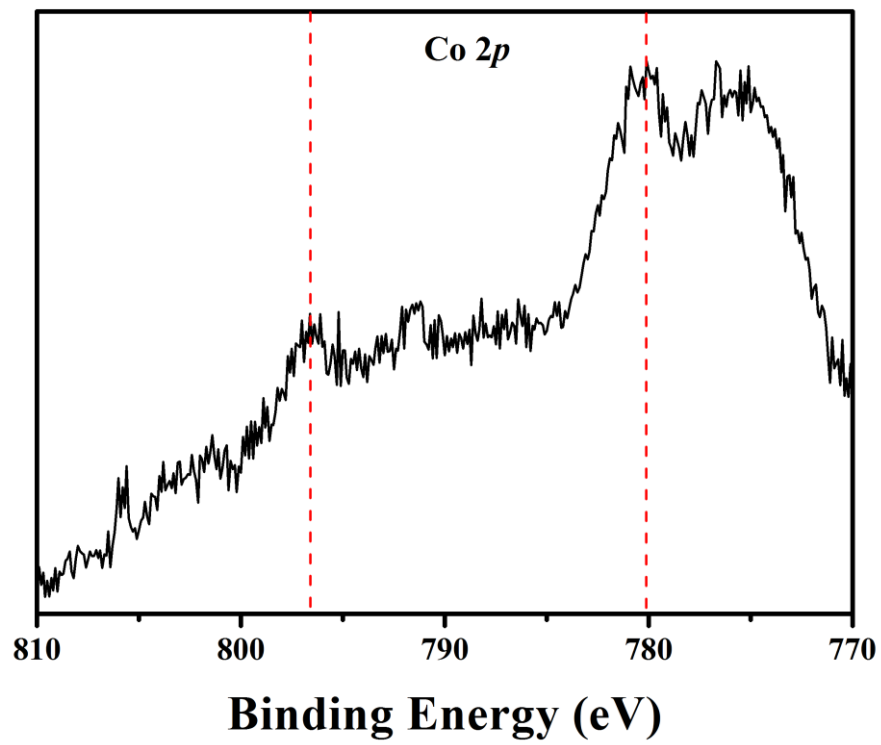

Figure S1. XPS spectrum of Co 2p state in  $(\text{LaCo})_{0.05}(\text{NaNb})_{0.95}\text{O}_3$
